# Supplementary material for: Dynamics and origin of PM2.5during a three-year sampling period in Beijing, China
Source: Royal Society of Chemistry journal article supplement (doi:10.1039/c0em00467g), 2010-12-21
Supplement: c0em00467g.pdf [file c0em00467g.pdf]

## This is the supplementary information

**Table S1** Average concentrations ( $\mu\text{g m}^{-3}$ ) of crustal elements in  $\text{PM}_{2.5}$  for the different seasons from spring 2005 to spring 2008

| Year  | Season | Mg         | Al         | K          | Ca         | Fe         |
|-------|--------|------------|------------|------------|------------|------------|
| 05    | Spring | <b>0.7</b> | <b>2.7</b> | <b>2.0</b> | <b>3.6</b> | <b>2.1</b> |
| 05    | Summer | 0.2        | 1.2        | 1.2        | 0.8        | 0.7        |
| 05    | Autumn | 0.4        | 2.2        | 0.9        | 1.5        | 0.9        |
| 05/06 | Winter | 0.3        | 0.7        | 1.7        | 1.0        | 0.7        |
| 06    | Spring | <b>1.2</b> | <b>4.2</b> | <b>2.6</b> | <b>2.9</b> | <b>2.7</b> |
| 06    | Summer | 0.3        | 0.5        | 1.7        | 1.6        | 0.7        |
| 06    | Autumn | 0.4        | 0.7        | 2.1        | 1.7        | 1.0        |
| 06/07 | Winter | 0.5        | 1.0        | 2.3        | 1.9        | 1.1        |
| 07    | Spring | <b>0.7</b> | <b>2.0</b> | <b>1.9</b> | <b>2.8</b> | <b>1.6</b> |
| 07    | Summer | 0.2        | 0.6        | 2.6        | 1.9        | 0.8        |
| 07    | Autumn | 0.5        | 1.1        | 2.1        | 2.9        | 1.4        |
| 07/08 | Winter | 0.7        | 1.8        | 2.3        | 2.3        | 1.6        |
| 08    | Spring | <b>0.9</b> | <b>2.4</b> | <b>1.9</b> | <b>3.3</b> | <b>1.9</b> |

**Table S2** Origin and sources of  $\text{PM}_{2.5}$  during high particle concentration episodes

| Peak No. | Analytical Method   |    |     |    | Origin     | Sources                                                                                               |
|----------|---------------------|----|-----|----|------------|-------------------------------------------------------------------------------------------------------|
|          | Backward Trajectory | FA | SEM | EF |            |                                                                                                       |
| Peak I   | ■                   |    | ■   | ■  | Source II  | Long-range transport soil dust and local re-suspended soil particles                                  |
| Peak II  | ■                   |    | ■   | ■  | Source II  | Long-range transport soil dust and local re-suspended soil particles                                  |
| Peak III |                     | ■  |     |    | Source II  | Different anthropogenic sources and refuse disposal                                                   |
| Peak IV  |                     |    |     | ■  | Source II  | Long-range transport soil dust and different anthropogenic sources                                    |
| Peak V   |                     |    |     | ■  | Source III | Long-range transport soil dust and local re-suspended soil particles                                  |
| Peak VI  |                     |    |     | ■  | Source III | Long-range transport soil dust, local re-suspended soil particles and different anthropogenic sources |
| Peak VII |                     |    |     | ■  | Source I   | Long-range transport soil dust, local re-suspended soil particles and different anthropogenic sources |

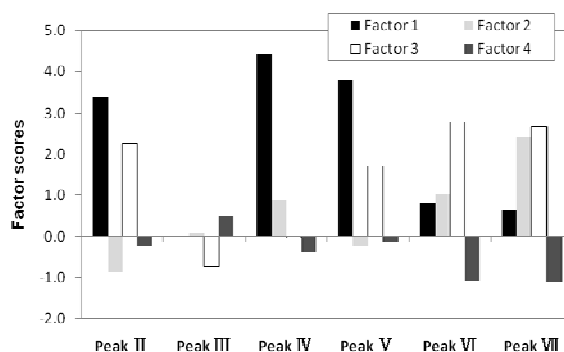

**Fig.S1** Factor scores of peak II to peak VII (peak I was not included in FA due to the not enough elements as other samples for FA)
